# Supplementary material
Source: publisher figshare collection journal article supplement (https://rs.figshare.com/ndownloader/files/16838522)

## Supplemental Figure S1

**Figure S1.** Representative ‘akeke’e song spectrogram displaying the 11 measured acoustic variables: 1) song length (seconds), 2) total number of syllables (n=11), 3) number of unique syllable types (n=2), 4) trill rate (total syllables/song length), 5) average number of notes per syllable (n=1.5), 6) average number of frequency changes within a syllable (n=1.6), 7) number of frequency changes between syllables within the song (n=2), 8) peak frequency (kHz), 9) low (kHz) and 10) high (kHz) frequencies at which the amplitude exceeded -24dB relative to the peak, and 11) frequency bandwidth (kHz).

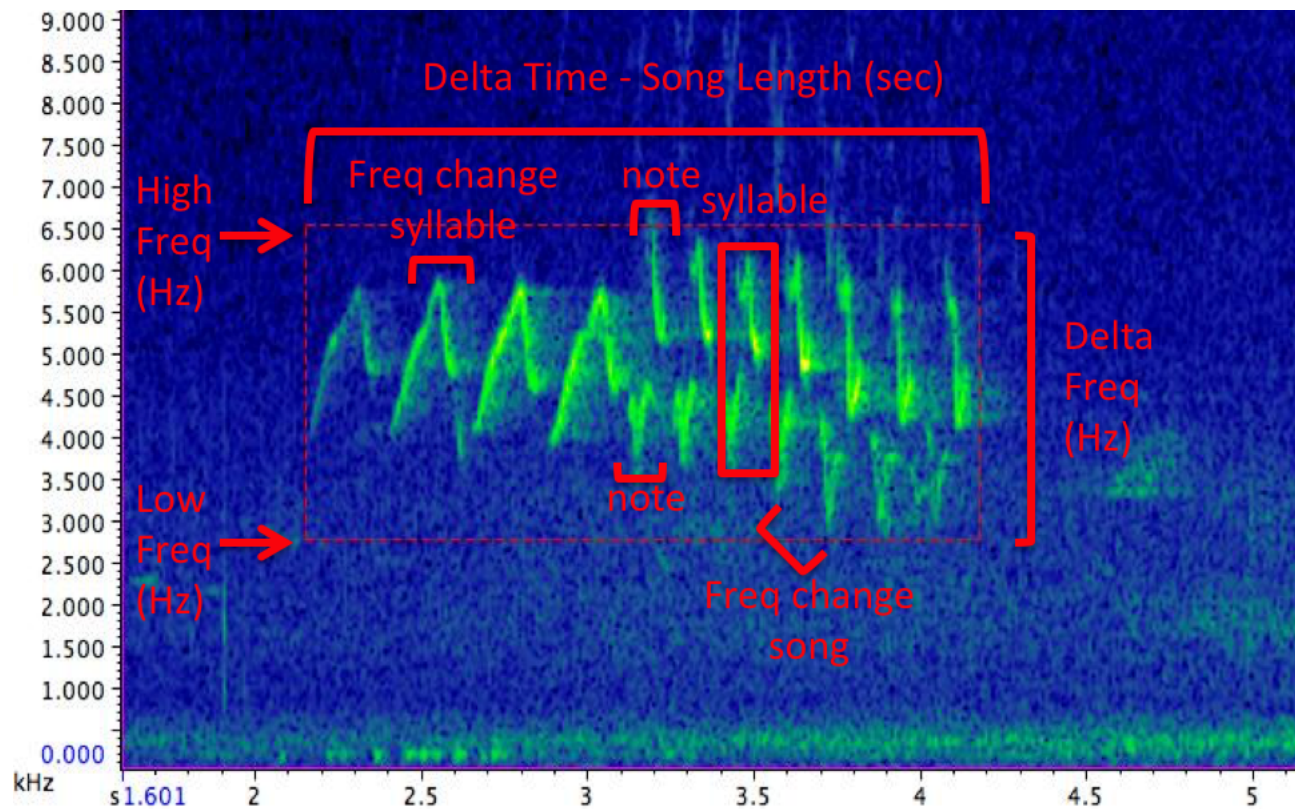

Supplement: Supplementary file [file 16838522]
